# Supplementary material for: Towards reliable quantification of hydroxyl radicals in the Fenton reaction using chemical probes
Source: Royal Society of Chemistry journal article supplement (doi:10.1039/c7ra13209c), 2018-01-01
Supplement: c7ra13209c1.pdf [file c7ra13209c1.pdf]

## Supplementary Information for

### **Towards reliable quantification of hydroxyl radicals in the Fenton reaction using chemical probes**

Burgos Castillo Rutely C.<sup>a,c</sup>, Fontmorin Jean-M.<sup>a</sup>, Tang Walter Z.<sup>b</sup>, Dominguez-Benetton Xochitl<sup>c,d</sup> and Sillanpää Mika<sup>a,b</sup>

<sup>a</sup> Laboratory of Green Chemistry, School of Engineering Science, Lappeenranta University of Technology - Sammonkatu 12, FI-50130 Mikkeli, Finland

<sup>b</sup> Department of Civil and Environmental Engineering, Florida International University, Miami, FL-33174, USA

<sup>c</sup> Separation and Conversion Technologies, Flemish Institute for Technological Research (VITO), Boeretang 200, 2400, Mol, Belgium.

\*Corresponding author: Phone: +358 50 527 7484, email: rutely.burgos.castillo@lut.fi (R. C. Burgos Castillo)

In Fig. S1 is shown typical spectra of 7HC standard: the fluorescence intensity increased with the dosage of 7HC. The inset (A) in Fig. S1 depicts the calibration curve constructed using 7HC (concentration ranging from  $2 \times 10^{-7}$  M to  $2 \times 10^{-6}$  M), wherein the fluorescence intensity at 456 nm is linearly correlated ( $R^2 = 0.9997$ ). The limit of detection ( $LOD = 3.3 * (SD/S)$ ) was established at  $3.4 \times 10^{-8}$  M, where SD is the standard deviation of blanks and S is the slope of the linear fit equation

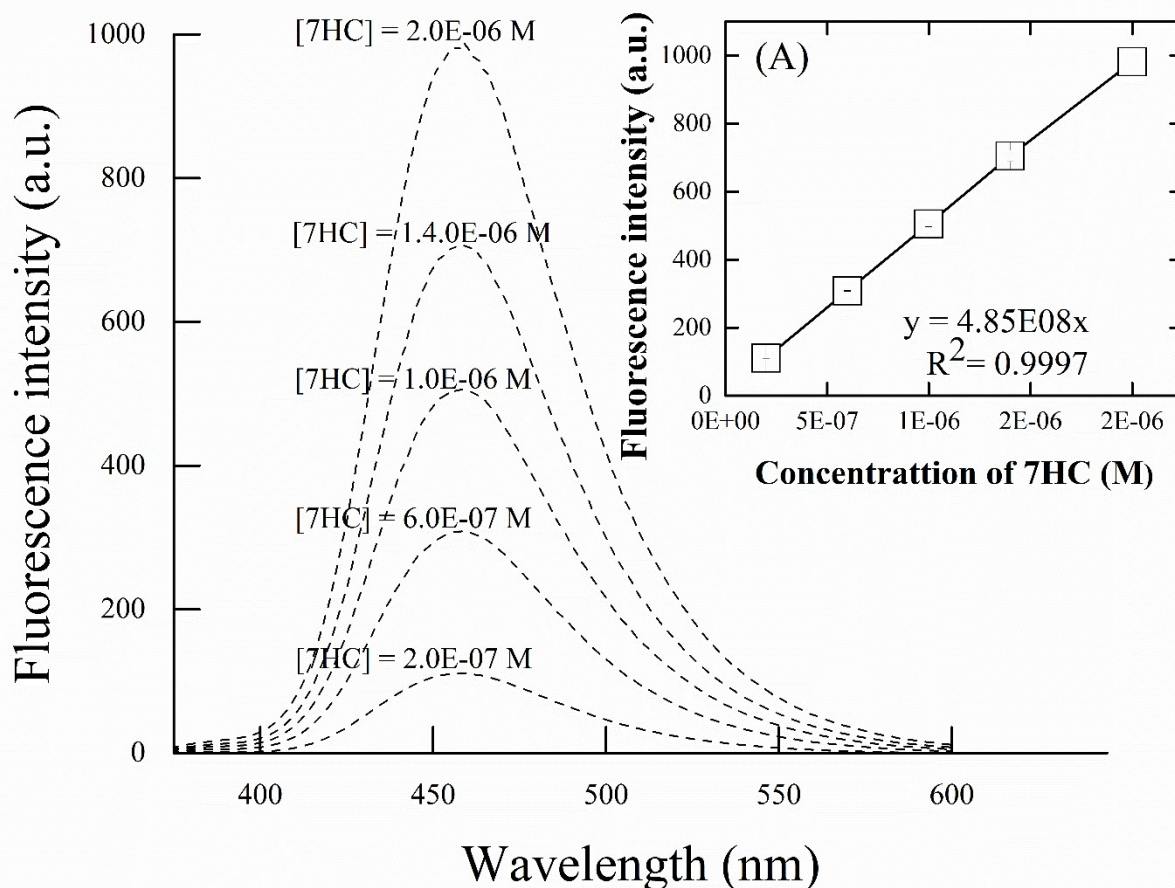

**Fig. S1.** Fluorescence spectra of umbelliferone (7HC) as a function of increasing the dosage. (A) Inset of the calibration curve ( $R^2 = 0.9997$  with 95% confidence interval and 95% prediction band).

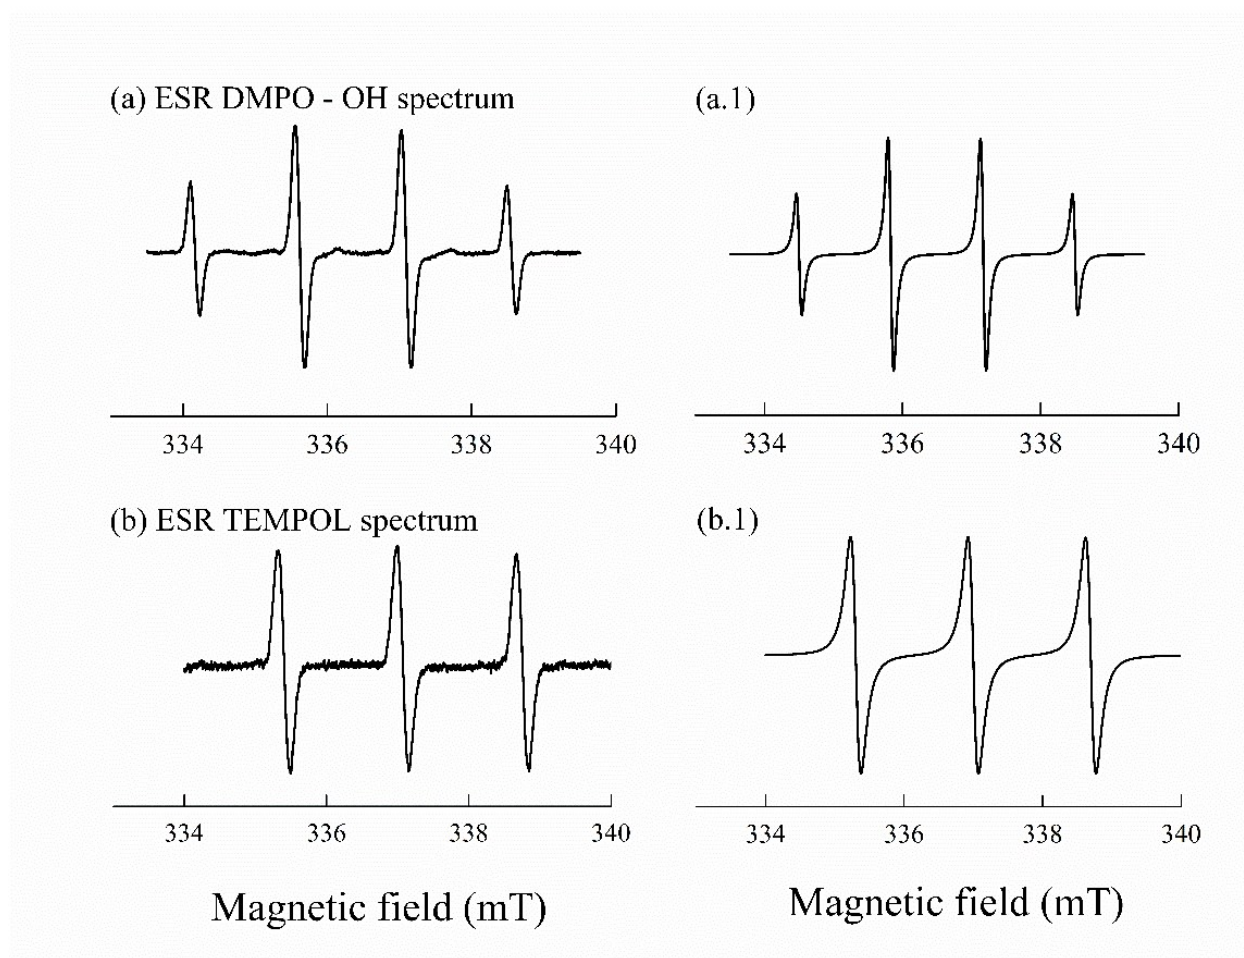

**Fig. S2.** Electron spin resonance (ESR) spectrum of (a) 5,5-dimethyl-1-pyrroline-N-oxide (DMPO-OH) adduct and (b) 4-hydroxy-2,2,5,5-tetramethyl-piperidine-1-oxyl (TEMPOL). Computer simulation of (a.1) DMPO-OH adduct ( $a_H = 1.46 \text{ mT}$ ;  $a_N = 1.47 \text{ mT}$ ) and (b.1) TEMPOL ( $a_N = 1.68 \text{ mT}$ ).

In Fig. S3 are depicted the EPR spectra of TEMPOL. The inset (A) describes the calibration curve constructed using the peak-to-peak intensity of the TEMPOL signal ( $R^2 = 0.9879$ ) with the concentration ranging from  $2.5 \times 10^{-6}$  M to  $12.5 \times 10^{-6}$  M

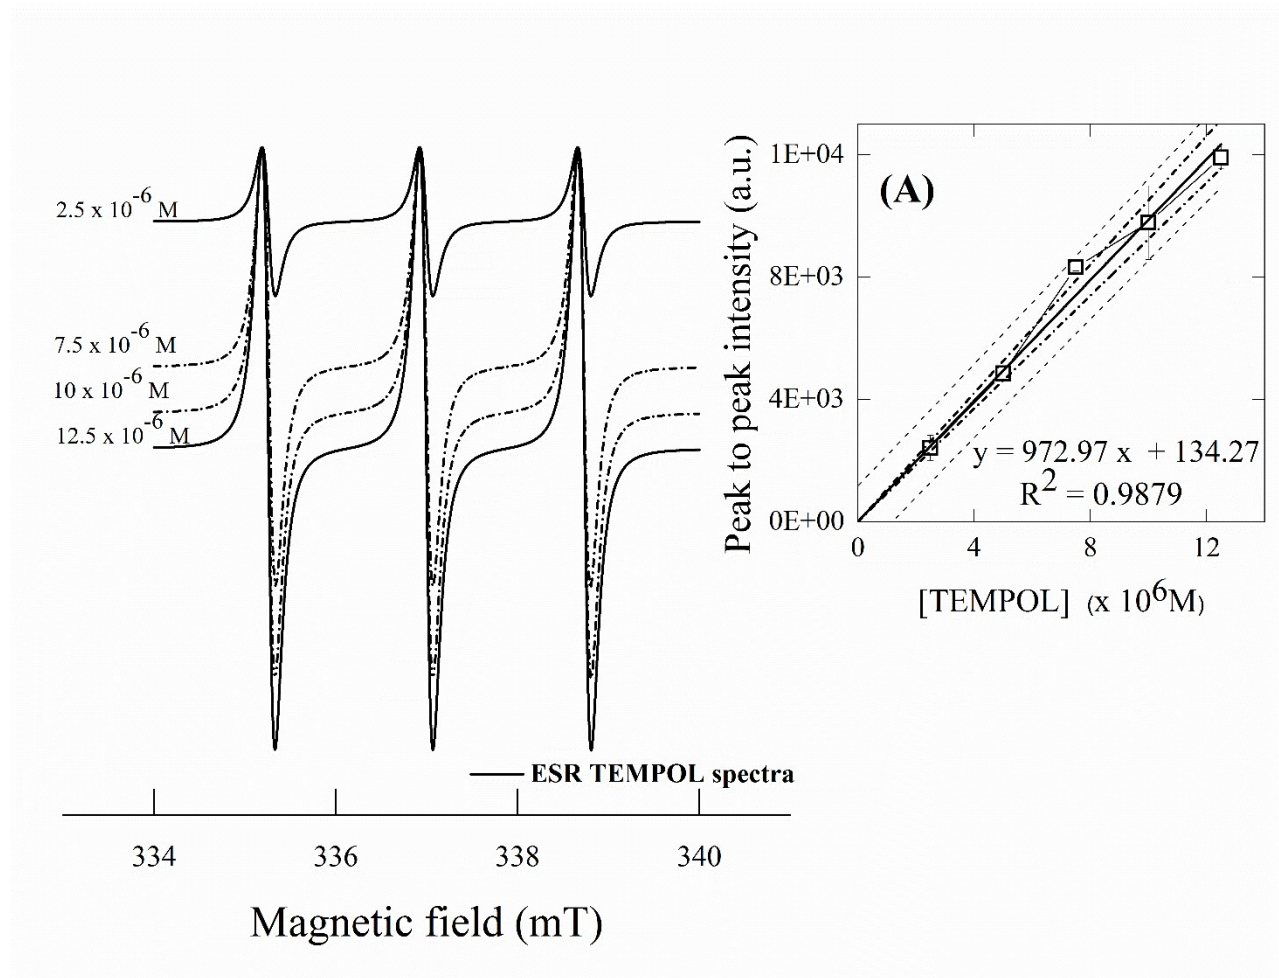

**Fig. S3.** Simulated electron spin resonance (ESR) spectrum of 4-hydroxy-2,2,6,6-tetramethylpiperidin-1-oxyl (TEMPOL) radical as a function of increasing the dosage. (A) Inset of the calibration curve ( $R^2 = 0.9879$  with 95% confidence interval and 95% prediction band).

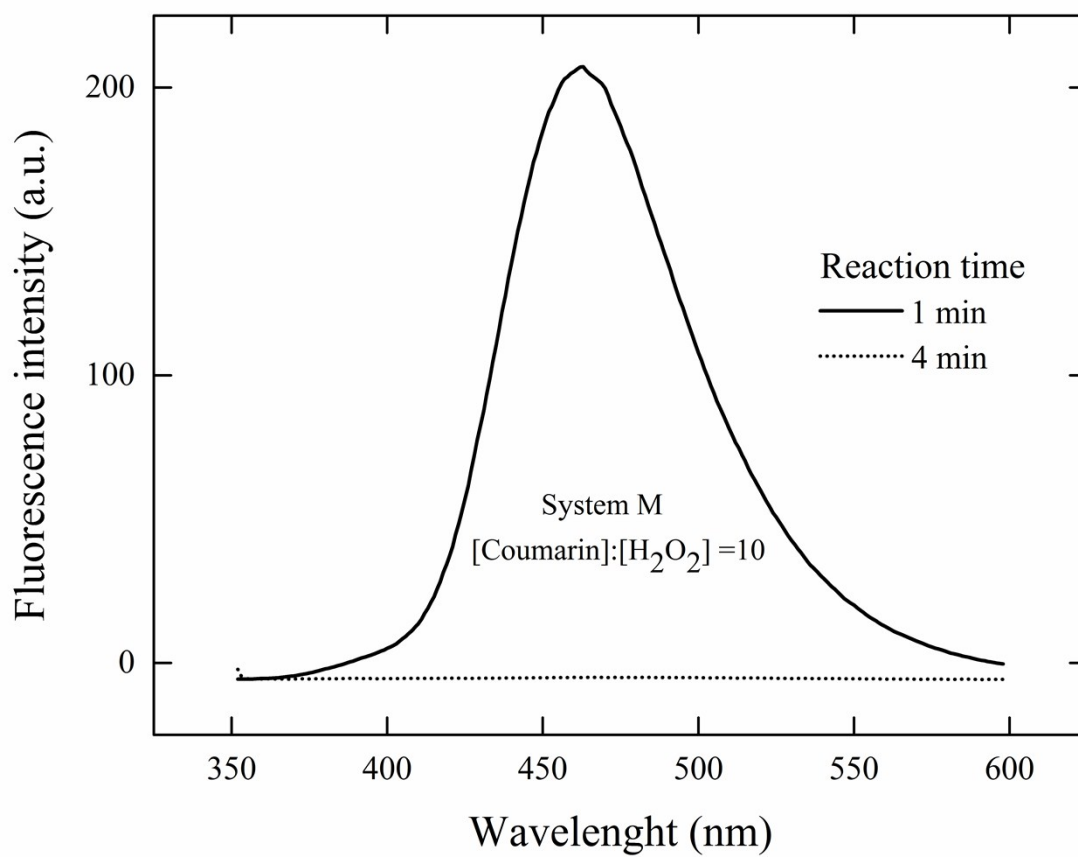

**Fig. S4.** Effect of [Coumarin]: [H<sub>2</sub>O<sub>2</sub>] ratio on molar formation of <sup>•</sup>OH (using 1 mM coumarin concentration) at [H<sub>2</sub>O<sub>2</sub>]: [Fe<sup>2+</sup>] ratio = 10.

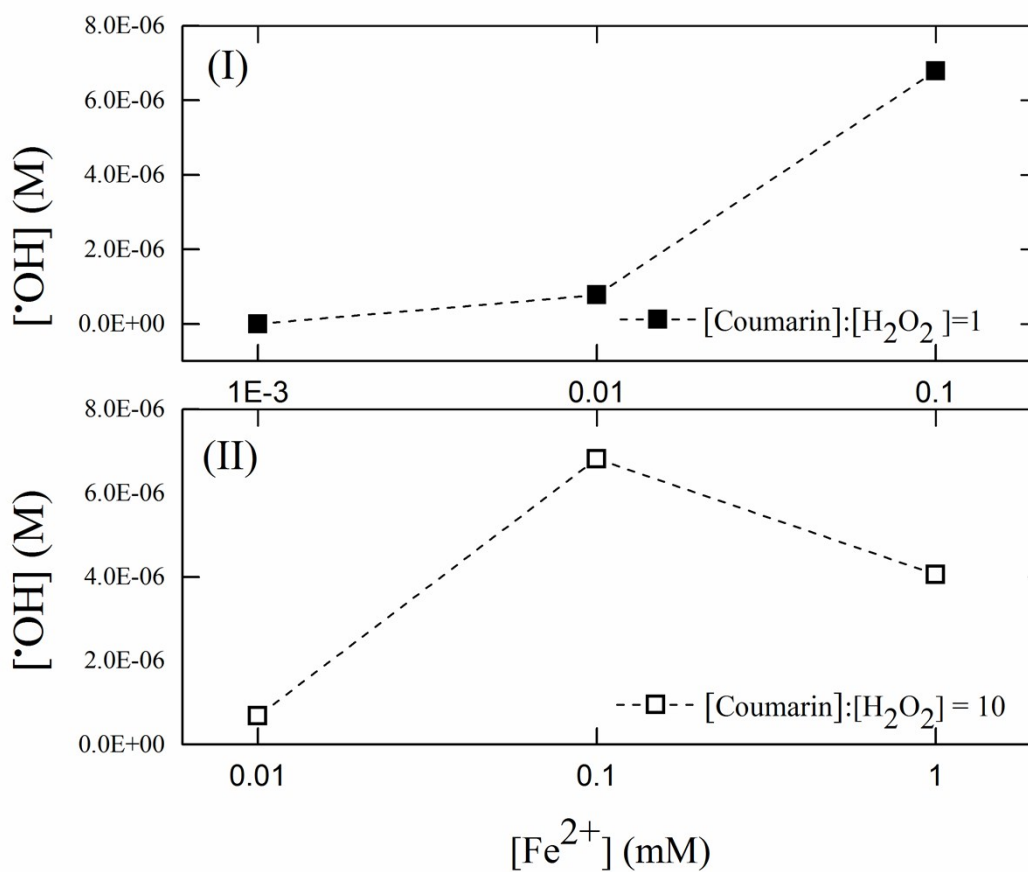

**Fig. S5.** Highlighted effect of  $[\text{coumarin}]:[\text{H}_2\text{O}_2]$  ratio on molar formation of  $\cdot\text{OH}$  at constant 1 mM coumarin and different initial  $[\text{H}_2\text{O}_2]$  of (I) 1 mM and (II) 10 mM. The  $x$ -axis is shown on a logarithm scale.

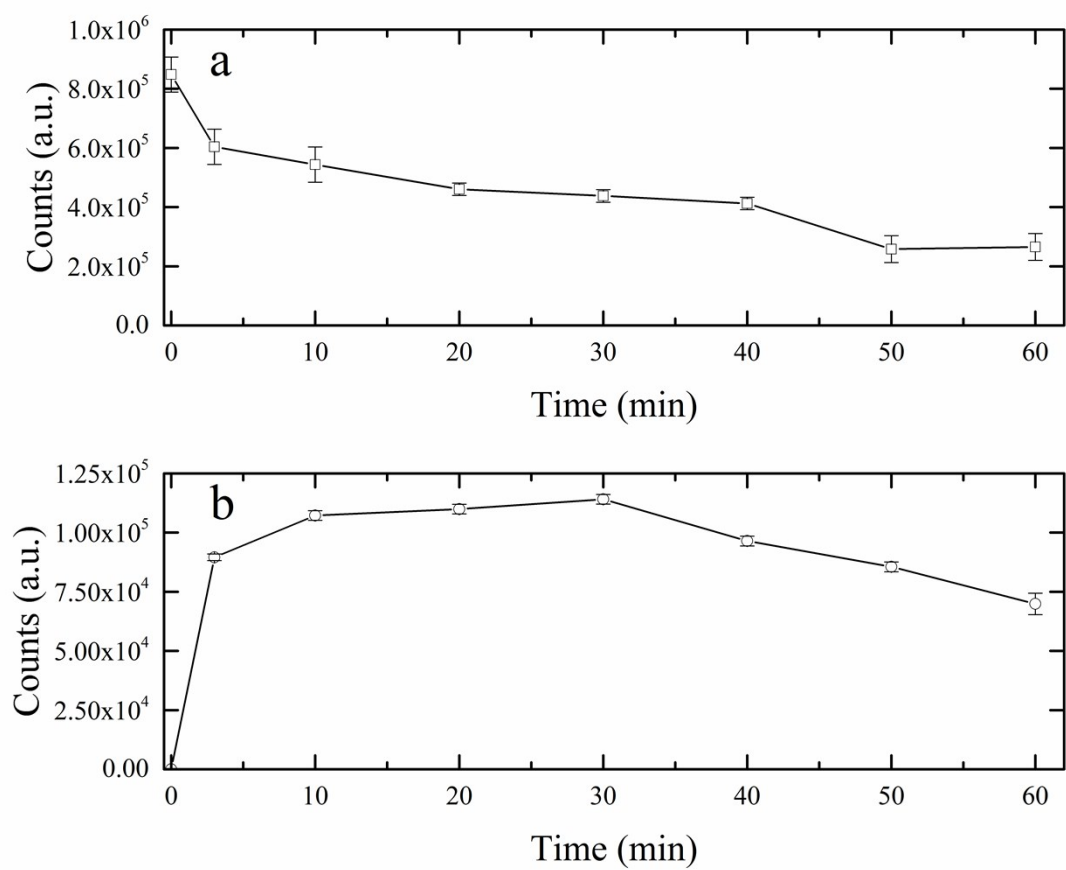

**Fig. S6.** Decomposition of coumarin (Fig. S6-a) and accumulation of 7HC (Fig.S6-b) using initial concentration of 1 mM coumarin; 1 mM  $\text{H}_2\text{O}_2$  and 0.1 mM  $\text{Fe}^{2+}$ .
